# Supplementary material for: Vertical farming: productivity, environmental impact, and resource use. A review
Source: Springer Nature journal article supplement (doi:10.1007/s13593-025-01055-w), 2025-09-23
Supplement: MOESM1 [file 13593_2025_1055_MOESM1_ESM.docx]

**Supplementary materials**

***Table S1.*** *Locations of open field trials and greenhouses considered within the study for the quantification of GreenHouse Gas (GHG) emissions (expressed as kg CO2 kg-1 FW) presented in Fig. 5 of the manuscript.*

| Citation | Farming system | Regions/State | Country | GHG |
| --- | --- | --- | --- | --- |
| Hospido et al. 2009 | Open field | Worchester | UK | 0.27 |
| Hospido et al. 2009 | Open field | Murcia | Spain | 0.26 |
| Maraseni et al 2010 | Open field | Not specified | Australia | 0.32 |
| Davis et al. 2011 | Open field | Not specified | Sweden | 0.28 |
| Venkat 2012 | Open field | California | USA | 0.19 |
| Venkat 2012 | Open field | California | USA | 0.27 |
| Venkat 2012 | Open field | California | USA | 0.25 |
| Hall et al 2014 | Open field | Sydney | Australia | 0.25 |
| Hall et al 2014 | Open field | Sydney | Australia | 0.08 |
| Hall et al 2014 | Open field | Sydney | Australia | 0.32 |
| Romero Gamez et al 2014 | Open field | Andalusia | Spain | 0.01 |
| Romero Gamez et al 2014 | Open field | Andalusia | Spain | 0.01 |
| Romero Gamez et al 2014 | Open field | Andalusia | Spain | 0.02 |
| Romero Gamez et al 2014 | Open field | Andalusia | Spain | 0.03 |
| Romero Gamez et al 2014 | Open field | Andalusia | Spain | 0.03 |
| Romero Gamez et al 2014 | Open field | Andalusia | Spain | 0.03 |
| Romero Gamez et al 2014 | Open field | Andalusia | Spain | 0.03 |
| Romero Gamez et al 2014 | Open field | Andalusia | Spain | 0.03 |
| Romero Gamez et al 2014 | Open field | Andalusia | Spain | 0.03 |
| Romero Gamez et al 2014 | Open field | Andalusia | Spain | 0.04 |
| Romero Gamez et al 2014 | Open field | Andalusia | Spain | 0.04 |
| Romero Gamez et al 2014 | Open field | Andalusia | Spain | 0.04 |
| Romero Gamez et al 2014 | Open field | Andalusia | Spain | 0.03 |
| Romero Gamez et al 2014 | Open field | Andalusia | Spain | 0.03 |
| Romero Gamez et al 2014 | Open field | Andalusia | Spain | 0.03 |
| Romero Gamez et al 2014 | Open field | Andalusia | Spain | 0.04 |
| Romero Gamez et al 2014 | Open field | Andalusia | Spain | 0.04 |
| Romero Gamez et al 2014 | Open field | Andalusia | Spain | 0.04 |
| Li et al. 2020 | Open field | Singapore | Singapore | 0.02 |
| Blom et al 2022 | Open field | Not specified | The Netherlands | 0.54 |
| Blom et al 2022 | Open field | Not specified | The Netherlands | 0.49 |
| Casey et al. 2022 | Open field | Not specified | UK | 0.12 |
| Casey et al. 2022 | Open field | Not specified | Spain | 0.18 |
| Casey et al. 2022 | Open field | California | USA | 0.08 |
| Casey et al. 2022 | Open field | California | USA | 0.14 |
| Sandison et al. 2022 | Open field | Scotland | UK | 0.46 |
| De Oliveira et al 2023 | Open field | Murcia | Spain | 0.16 |
| Martin et al. 2023a | Open field | Not specified | Sweden | 0.18 |
| Martin et al. 2023a | Open field | Not specified | Italy | 0.18 |
| Martin et al. 2023a | Open field | Not specified | Spain | 0.18 |
| Maynard et al 2023 | Open field | New York | USA | 0.50 |
| Maynard et al 2023 | Open field | California | USA | 0.48 |
| Maynard et al 2023 | Open field | Illinois | USA | 0.50 |
| Maynard et al 2023 | Open field | Texas | USA | 0.50 |
| Hospido et al. 2009 | Low-tech GH | Worchester | UK | 0.18 |
| Romero Gamez et al 2014 | Low-tech GH | Asturias, Castilla León and Navarra | Spain | 0.22 |
| Romero Gamez et al 2014 | Low-tech GH | Asturias, Castilla León and Navarra | Spain | 0.21 |
| Romero Gamez et al 2014 | Low-tech GH | Asturias, Castilla León and Navarra | Spain | 0.21 |
| Romero Gamez et al 2014 | Low-tech GH | Asturias, Castilla León and Navarra | Spain | 0.21 |
| Romero Gamez et al 2014 | Low-tech GH | Asturias, Castilla León and Navarra | Spain | 0.21 |
| Romero Gamez et al 2014 | Low-tech GH | Asturias, Castilla León and Navarra | Spain | 0.21 |
| Bartzas et al 2015 | Low-tech GH | Liguria | Italy | 0.21 |
| Bartzas et al 2015 | Low-tech GH | Murcia | Spain | 0.23 |
| Fusi et al. 2016 | Low-tech GH | Lombardia | Italy | 0.58 |
| Blom et al 2022 | Low-tech GH | Not specified | The Netherlands | 1.21 |
| Blom et al 2022 | Low-tech GH | Not specified | The Netherlands | 0.79 |
| Sandison et al 2022 | Low-tech GH | Scotland | UK | 0.25 |
| Martin et al. 2023a | Low-tech GH | Not specified | Sweden | 0.11 |
| Martin et al. 2023a | Low-tech GH | Lombardia | Italy | 0.65 |
| Martin et al. 2023a | Low-tech GH | Not specified | Spain | 0.60 |
| Martin et al. 2023a | Low-tech GH | Not specified | Sweden | 0.36 |
| Hospido et al 2009 | High-tech GH | Worchester | UK | 2.55 |
| Stoessel et al 2012 | High-tech GH | Not specified | Switzerland | 3.50 |
| Yrjanainen et al 2013 | High-tech GH | Not specified | Finland | 2.82 |
| Rasanen et al 2014 | High-tech GH | Not specified | Finland | 2.70 |
| Hallikainen 2019 | High-tech GH | Not specified | Sweden | 3.96 |
| Hallikainen 2019 | High-tech GH | Not specified | Sweden | 3.08 |
| Hallikainen 2019 | High-tech GH | Not specified | Sweden | 1.96 |
| Hallikainen 2019 | High-tech GH | Not specified | Sweden | 1.93 |
| Hallikainen 2019 | High-tech GH | Not specified | Sweden | 1.89 |
| Hallikainen 2019 | High-tech GH | Not specified | Sweden | 1.87 |
| Hallikainen 2019 | High-tech GH | Not specified | The Netherlands | 1.32 |
| Hallikainen 2019 | High-tech GH | Not specified | The Netherlands | 1.18 |
| Hallikainen 2019 | High-tech GH | Not specified | The Netherlands | 1.09 |
| Hallikainen 2019 | High-tech GH | Not specified | The Netherlands | 1.03 |
| Hallikainen 2019 | High-tech GH | Not specified | The Netherlands | 1.05 |
| Hallikainen 2019 | High-tech GH | Not specified | The Netherlands | 1.03 |
| Hallikainen 2019 | High-tech GH | Not specified | United Arab Emirates | 3.15 |
| Hallikainen 2019 | High-tech GH | Not specified | United Arab Emirates | 1.89 |
| Hallikainen 2019 | High-tech GH | Not specified | United Arab Emirates | 0.18 |
| Hallikainen 2019 | High-tech GH | Not specified | United Arab Emirates | 0.06 |
| Hallikainen 2019 | High-tech GH | Not specified | United Arab Emirates | 0.03 |
| Hallikainen 2019 | High-tech GH | Not specified | United Arab Emirates | 0.01 |
| Silvenius et al 2019 | High-tech GH | Not specified | Finland | 4.30 |
| Li et al 2020 | High-tech GH | Singapore | Singapore | 2.97 |
| Li et al. 2020 | High-tech GH | Singapore | Singapore | 2.82 |
| Blom et al 2022 | High-tech GH | Not specified | The Netherlands | 1.45 |
| Blom et al 2022 | High-tech GH | Not specified | The Netherlands | 0.75 |
| Sandison et al 2022 | High-tech GH | Scotland | UK | 2.94 |
| Song et al 2022 | High-tech GH | Singapore | Singapore | 6.50 |
| Martin et al. 2023a | High-tech GH | Not specified | The Netherlands | 1.44 |
| Joensuu et al 2024 | High-tech GH | Not specified | Finland | 3.30 |
| Joensuu et al 2024 | High-tech GH | Not specified | Finland | 2.00 |
| Maynard et al 2023 | High-tech GH | New York | USA | 4.88 |
| Maynard et al 2023 | High-tech GH | California | USA | 4.16 |
| Maynard et al 2023 | High-tech GH | Illinois | USA | 5.77 |
| Maynard et al 2023 | High-tech GH | Texas | USA | 4.10 |

***Table S2.*** *Locations of open field trials and greenhouses considered within the study for the quantification of Water Use Efficiency (WUE, expressed as g FW L-1 H2O) presented in Fig. 7 of the manuscript.*

| Citation | Farming system | City/Region/State | Country | WUE |
| --- | --- | --- | --- | --- |
| Hospido et al., 2009 | Open field | Murcia | Spain | 18.6 |
| Hospido et al., 2009 | Open field | Worchester | UK | 23.0 |
| Barbosa et al., 2015 | Open field | Arizona | USA | 4.4 |
| Barbosa et al., 2015 | Open field | Arizona | USA | 3.6 |
| Bartzas et al., 2015 | Open field | Albenga | Italy | 4.2 |
| Goldstein et al., 2016 | Open field | Massachusets | USA | 4.5 |
| Van Ginkel et al., 2017 | Open field | California | USA | 4.9 |
| Van Ginkel et al., 2017 | Open field | California | USA | 5.2 |
| Michelon et al., 2020 | Open field | Central Dry Zone | Myanmar | 14.0 |
| Maynard et al., 2023 | Open field | New York | USA | 13.3 |
| Maynard et al., 2023 | Open field | California | USA | 28.6 |
| Maynard et al., 2023 | Open field | Illinois | USA | 18.9 |
| Maynard et al., 2023 | Open field | Texas | USA | 9.5 |
| Hospido et al., 2009 | Low-tech GH | Worchester | UK | 25.4 |
| Bartzas et al., 2015 | Low-tech GH | Liguria | Italy | 10.8 |
| Bartzas et al., 2015 | Low-tech GH | Murcia | Spain | 9.0 |
| Kirnak et al., 2016 | Low-tech GH | Murcia | Spain | 6.2 |
| Kirnak et al., 2016 | Low-tech GH | Sanlurfa | Turkey | 6.5 |
| Kirnak et al., 2016 | Low-tech GH | Sanlurfa | Turkey | 6.9 |
| Kirnak et al., 2016 | Low-tech GH | Sanlurfa | Turkey | 7.4 |
| Chen et al., 2019 | Low-tech GH | Beijing | China | 20.9 |
| Chen et al., 2019 | Low-tech GH | Beijing | China | 25.2 |
| Muharomah et al., 2020 | Low-tech GH | Bogor | Indonesia | 29.6 |
| Cerez and Sahin 2023 | Low-tech GH | Konya | Turkey | 38.12 |
| Cerez and Sahin 2023 | Low-tech GH | Konya | Turkey | 48.87 |
| Cerez and Sahin 2023 | Low-tech GH | Konya | Turkey | 54.12 |
| Cerez and Sahin 2023 | Low-tech GH | Konya | Turkey | 55.96 |
| Cerez and Sahin 2023 | Low-tech GH | Konya | Turkey | 67.87 |
| Cerez and Sahin 2023 | Low-tech GH | Konya | Turkey | 75.24 |
| Cerez and Sahin 2023 | Low-tech GH | Konya | Turkey | 72.17 |
| Cerez and Sahin 2023 | Low-tech GH | Konya | Turkey | 61.65 |
| Maynard et al., 2023 | Low-tech GH | New York | USA | 4.5 |
| Maynard et al., 2023 | Low-tech GH | California | USA | 4.5 |
| Maynard et al., 2023 | Low-tech GH | Illinois | USA | 4.5 |
| Maynard et al., 2023 | Low-tech GH | Texas | USA | 4.5 |
| Li et al., 2024 | Low-tech GH | Singapore | Singapore | 6.29 |
| Li et al., 2024 | Low-tech GH | Singapore | Singapore | 7.63 |
| Li et al., 2024 | Low-tech GH | Singapore | Singapore | 9.44 |
| Li et al., 2024 | Low-tech GH | Singapore | Singapore | 6.07 |
| Li et al., 2024 | Low-tech GH | Singapore | Singapore | 6.57 |
| Li et al., 2024 | Low-tech GH | Singapore | Singapore | 10.56 |
| Hospido et al., 2009 | High-tech GH | Worchester | UK | 87.8 |
| Barbosa et al., 2015 | High-tech GH | Arizona | USA | 41.6 |
| Barbosa et al., 2015 | High-tech GH | Arizona | USA | 62.5 |
| Goldstein et al., 2016 | High-tech GH | Massachusets | USA | 50.0 |
| Chen et al., 2019 | High-tech GH | Beijing | China | 36.8 |
| Chen et al., 2019 | High-tech GH | Beijing | China | 38.5 |
| Maynard et al., 2023 | High-tech GH | New York | USA | 50.0 |
| Maynard et al., 2023 | High-tech GH | California | USA | 33.3 |
| Maynard et al., 2023 | High-tech GH | Illinois | USA | 40.0 |
| Maynard et al., 2023 | High-tech GH | Texas | USA | 15.4 |
| Wang et al., 2023 | High-tech GH | Beijing | China | 74.9 |
| Wang et al., 2023 | High-tech GH | Beijing | China | 76.8 |
| Wang et al., 2023 | High-tech GH | Beijing | China | 71.7 |
| Wang et al., 2023 | High-tech GH | Beijing | China | 120.6 |
| Wang et al., 2023 | High-tech GH | Beijing | China | 145.4 |
| Wang et al., 2023 | High-tech GH | Beijing | China | 146.7 |
| Wang et al., 2023 | High-tech GH | Beijing | China | 41.9 |
| Wang et al., 2023 | High-tech GH | Beijing | China | 47.6 |
| Wang et al., 2023 | High-tech GH | Beijing | China | 48.9 |
| Wang et al., 2023 | High-tech GH | Beijing | China | 79.4 |
| Wang et al., 2023 | High-tech GH | Beijing | China | 81.3 |
| Wang et al., 2023 | High-tech GH | Beijing | China | 70.5 |
